# Supplementary material
Source: PubMed Central journal article supplement (PMC1904399)
Supplement: ppat.0030077.st001.pdf [file ppat.0030077.st001.pdf]

Gissot et al Supp Table 1

| Peak | start  | stop   | size | ChIPOTle average ratio threshold=1 |     |     |         | ChIPOTle average ratio threshold=0.6 |     |     |         | SignalMAP threshold=1 |     |     |         | SignalMAP threshold=0.8 |     |     |         | TilingArray |            |             | EST | RT-PCR | Other             |
|------|--------|--------|------|------------------------------------|-----|-----|---------|--------------------------------------|-----|-----|---------|-----------------------|-----|-----|---------|-------------------------|-----|-----|---------|-------------|------------|-------------|-----|--------|-------------------|
|      |        |        |      | GE1                                | GE2 | GE3 | Average | GE1                                  | GE2 | GE3 | Average | GE1                   | GE2 | GE3 | Average | GE1                     | GE2 | GE3 | Average | P-value     | >threshold | Gene number |     |        |                   |
| 1    | 1220   | 2650   | 1430 | +                                  | +   | +   | +       | +                                    | +   | +   | +       | +                     | +   | +   | +       | +                       | +   | +   | +       | ns          | +          | 1           | +   | +      |                   |
| 2    | 19750  | 20850  | 1100 | +                                  | +   | +   | +       | +                                    | +   | +   | +       | +                     | +   | +   | +       | +                       | +   | +   | +       | +++         | +          | 3           | +   | +      |                   |
| 3    | 26150  | 28000  | 1850 | +                                  | +   | +   | +       | +                                    | +   | +   | +       | +                     | +   | +   | +       | +                       | +   | +   | +       | +++         | +          | 5           | +   | +      |                   |
| 4    | 50350  | 52750  | 2400 | +                                  | +   | +   | +       | +                                    | +   | +   | +       | +                     | +   | +   | +       | +                       | +   | +   | +       | +++         | +          | 6           | +   | +      |                   |
| 5    | 53500  | 55050  | 1550 | -                                  | +   | +   | +       | -                                    | +   | +   | +       | +                     | +   | -   | +       | +                       | +   | +   | +       | x           | x          | 7           | -   | +      | 2 kb away         |
| 6    | 74400  | 76200  | 1800 | -                                  | +   | +   | +       | -                                    | +   | +   | +       | +                     | +   | +   | +       | +                       | +   | +   | +       | ++          | +          | 10          | +   | +      |                   |
| 7    | 78000  | 80600  | 2600 | +                                  | +   | +   | +       | +                                    | +   | +   | +       | +                     | +   | +   | +       | +                       | +   | +   | +       | +++         | +          | 11          | -   | +      |                   |
| 8    | 116750 | 118350 | 1600 | +                                  | +   | +   | +       | +                                    | +   | +   | +       | +                     | +   | +   | +       | +                       | +   | +   | +       | x           | x          | 14          | +   | +      | 1.5 kb away       |
| 9    | 129771 | 131521 | 1750 | -                                  | +   | +   | +       | +                                    | +   | +   | +       | +                     | +   | +   | +       | +                       | +   | +   | +       | ns/+        | +/+        | 15,16       | +   | +      | BD                |
| 10   | 152621 | 154122 | 1501 | -                                  | -   | -   | -       | -                                    | +   | +   | +       | -                     | +   | -   | -       | +                       | +   | +   | +       | ns          | +          | 18          | +   | +      |                   |
| 11   | 155272 | 157022 | 1750 | -                                  | +   | +   | +       | +                                    | +   | +   | +       | +                     | +   | +   | +       | +                       | +   | +   | +       | +++         | +          | 19          | -   | +      |                   |
| 12   | 167622 | 169872 | 2250 | +                                  | +   | +   | +       | +                                    | +   | +   | +       | +                     | +   | +   | +       | +                       | +   | +   | +       | +++         | +          | 20          | +   | +      |                   |
| 13   | 179322 | 180622 | 1300 | +                                  | +   | +   | +       | +                                    | +   | +   | +       | +                     | +   | +   | +       | +                       | +   | +   | +       | ns          | +          | 23          | -   | +      | BD?               |
| 14   | 200872 | 204024 | 1152 | +                                  | +   | +   | +       | +                                    | +   | +   | +       | +                     | +   | -   | +       | +                       | +   | +   | +       | +++         | +          | 24/25/26    | +   | +      | BD?               |
| 15   | 210624 | 212074 | 1450 | +                                  | +   | +   | +       | +                                    | +   | +   | +       | +                     | +   | +   | +       | +                       | +   | +   | +       | ns          | +          | 28          | +   | +      |                   |
| 16   | 214424 | 215974 | 1550 | -                                  | -   | -   | -       | -                                    | +   | +   | +       | -                     | -   | -   | -       | -                       | +   | +   | +       | ns          | -          | 29          | +   | +      |                   |
| 17   | 219824 | 221574 | 1750 | -                                  | +   | +   | +       | +                                    | +   | +   | +       | +                     | +   | +   | +       | +                       | +   | +   | +       | ns/+        | +/+        | 30/31       | +   | +      | BD?               |
| 18   | 231824 | 233624 | 1800 | +                                  | +   | +   | +       | +                                    | +   | +   | +       | +                     | +   | +   | +       | +                       | +   | +   | +       | ++          | +          | 33          | +   | +      | BD with noncoding |
| 19   | 261028 | 262278 | 1250 | +                                  | +   | +   | +       | +                                    | +   | +   | +       | +                     | +   | +   | +       | +                       | +   | +   | +       | +++         | +          | 36          | +   | +      |                   |
| 20   | 268932 | 271432 | 2500 | +                                  | +   | +   | +       | +                                    | +   | +   | +       | +                     | +   | +   | +       | +                       | +   | +   | +       | ++          | +          | 37          | +   | +      |                   |
| 21   | 281332 | 282682 | 1350 | +                                  | +   | +   | +       | +                                    | +   | +   | +       | +                     | +   | +   | +       | +                       | +   | +   | +       | +++         | +          | 38          | +   | +      |                   |
| 22   | 283282 | 284533 | 1251 | +                                  | +   | +   | +       | +                                    | +   | +   | +       | +                     | +   | +   | +       | +                       | +   | +   | +       | +++         | +          | 39          | -   | +      |                   |
| 23   | 302284 | 303684 | 1400 | +                                  | +   | +   | +       | +                                    | +   | +   | +       | +                     | +   | +   | +       | +                       | +   | +   | +       | x           | x          | 40/41       | -   | +      | 2 kb away         |
| 24   | 304934 | 306036 | 1102 | +                                  | +   | +   | +       | +                                    | +   | +   | +       | +                     | +   | +   | +       | +                       | +   | +   | +       | +++         | +          | 42          | +   | +      |                   |
| 25   | 314386 | 315936 | 1550 | +                                  | +   | +   | +       | +                                    | +   | +   | +       | +                     | +   | +   | +       | +                       | +   | +   | +       | +++         | +          | 43          | +   | +      |                   |
| 26   | 316736 | 318094 | 1358 | +                                  | +   | +   | +       | +                                    | +   | +   | +       | +                     | +   | +   | +       | +                       | +   | +   | +       | +++         | +          | 44          | -   | +      |                   |
| 27   | 335894 | 338044 | 2150 | +                                  | +   | +   | +       | +                                    | +   | +   | +       | +                     | +   | +   | +       | +                       | +   | +   | +       | +++         | +          | 45          | -   | +      |                   |
| 28   | 347394 | 349744 | 2350 | +                                  | +   | +   | +       | +                                    | +   | +   | +       | +                     | +   | +   | +       | +                       | +   | +   | +       | ++          | +          | 46          | +   | +      |                   |
| 29   | 350444 | 351994 | 1550 | -                                  | +   | +   | +       | +                                    | +   | +   | +       | +                     | +   | +   | +       | +                       | +   | +   | +       | +++         | +          | 47          | +   | +      |                   |
| 30   | 352294 | 355244 | 2950 | +                                  | +   | +   | +       | +                                    | +   | +   | +       | +                     | +   | +   | +       | +                       | +   | +   | +       | +++         | +          | 47          | +   | +      |                   |
| 31   | 365394 | 367444 | 2050 | +                                  | +   | +   | +       | +                                    | +   | +   | +       | +                     | +   | +   | +       | +                       | +   | +   | +       | +++         | +          | 51          | +   | +      |                   |
| 32   | 375494 | 377444 | 1950 | +                                  | +   | +   | +       | +                                    | +   | +   | +       | +                     | +   | +   | +       | +                       | +   | +   | +       | x           | x          | x           | +   | +      | no annotated gene |
| 33   | 383878 | 386077 | 2199 | +                                  | +   | +   | +       | +                                    | +   | +   | +       | +                     | +   | +   | +       | +                       | +   | +   | +       | +++/ns      | +/+        | 52,53       | +   | +      |                   |
| 34   | 386427 | 388927 | 2500 | +                                  | +   | +   | +       | +                                    | +   | +   | +       | +                     | +   | +   | +       | +                       | +   | +   | +       | +++         | +          | 54          | -   | +      |                   |
| 35   | 404779 | 405979 | 1200 | +                                  | +   | +   | +       | +                                    | +   | +   | +       | +                     | +   | +   | +       | +                       | +   | +   | +       | +++         | +          | 55          | -   | +      |                   |
| 36   | 452429 | 454379 | 1950 | +                                  | +   | +   | +       | +                                    | +   | +   | +       | +                     | +   | +   | +       | +                       | +   | +   | +       | +++         | +          | 63          | +   | +      |                   |
| 37   | 458279 | 461162 | 2883 | +                                  | +   | +   | +       | +                                    | +   | +   | +       | +                     | +   | +   | +       | +                       | +   | +   | +       | ++          | +          | 64          | +   | +      | BD?               |
| 38   | 465182 | 466682 | 1500 | +                                  | +   | +   | +       | +                                    | +   | +   | +       | +                     | +   | +   | +       | +                       | +   | +   | +       | +++         | +          | 66          | +   | +      |                   |
| 39   | 491428 | 493278 | 1850 | +                                  | +   | +   | +       | +                                    | +   | +   | +       | +                     | +   | +   | +       | +                       | +   | +   | +       | x           | x          | 67          | +   | +      | 1.5 kb away       |
| 40   | 502079 | 503779 | 1700 | +                                  | +   | +   | +       | +                                    | +   | +   | +       | +                     | +   | +   | +       | +                       | +   | +   | +       | x           | x          | 68          | +   | +      | 4 kb away         |
| 41   | 504979 | 507029 | 2050 | +                                  | +   | +   | +       | +                                    | +   | +   | +       | +                     | +   | +   | +       | +                       | +   | +   | +       | +++         | +          | 69          | +   | +      |                   |
| 42   | 518329 | 519519 | 1190 | -                                  | -   | +   | -       | +                                    | +   | +   | +       | -                     | +   | +   | +       | +                       | +   | +   | +       | +           | +          | 70          | -   | +      |                   |
| 43   | 528629 | 530579 | 1950 | -                                  | -   | +   | -       | +                                    | +   | +   | +       | -                     | +   | +   | +       | +                       | +   | +   | +       | +++         | +          | 71          | -   | +      |                   |
| 44   | 537841 | 539555 | 1714 | -                                  | +   | +   | +       | -                                    | +   | +   | +       | +                     | +   | +   | +       | +                       | +   | +   | +       | +           | +          | 72          | +   | +      |                   |
| 45   | 543105 | 545515 | 2410 | -                                  | +   | +   | +       | +                                    | +   | +   | +       | +                     | +   | +   | +       | +                       | +   | +   | +       | +++         | +          | 75          | +   | +      | BD?               |
| 46   | 557455 | 558955 | 1500 | +                                  | +   | +   | +       | +                                    | +   | +   | +       | +                     | +   | +   | +       | +                       | +   | +   | +       | (+)         | +          | 76          | +   | +      | BD?               |
| 47   | 572755 | 575505 | 2750 | +                                  | +   | +   | +       | +                                    | +   | +   | +       | +                     | +   | +   | +       | +                       | +   | +   | +       | +++         | +/+        | 79,80       | -/+ | +      |                   |
| 48   | 579505 | 581155 | 1650 | +                                  | +   | +   | +       | +                                    | +   | +   | +       | +                     | +   | +   | +       | +                       | +   | +   | +       | +++         | +          | 81          | +   | +      |                   |
| 49   | 601755 | 603405 | 1650 | +                                  | +   | +   | +       | +                                    | +   | +   | +       | +                     | +   | +   | +       | +                       | +   | +   | +       | +++         | +          | 87          | +   | +      |                   |
| 50   | 620680 | 622930 | 2250 | +                                  | +   | +   | +       | +                                    | +   | +   | +       | +                     | +   | +   | +       | +                       | +   | +   | +       | +++         | +          | 88          | +   | +      |                   |
| 51   | 633900 | 635400 | 1500 | -                                  | -   | -   | -       | -                                    | -   | -   | -       | -                     | -   | -   | -       | -                       | -   | -   | -       | ns          | -          | 89          | -   | -      | DNA repair        |
| 52   | 637840 | 639300 | 1460 | +                                  | +   | +   | +       | +                                    | +   | +   | +       | +                     | +   | +   | +       | +                       | +   | +   | +       | +++         | +          | 90          | -   | +      |                   |
